# Supplementary material
Source: publisher figshare collection journal article supplement (https://acs.figshare.com/ndownloader/files/3957415)
Supplement: Supplementary file 1 [file 3957415]

Supporting Information for the manuscript entitled:

# High Performance Reverse Osmosis CNT/Polyamide Nanocomposite Membrane by Controlled Interfacial Interactions

*Hee Joong Kim, Kwonyong Choi, Youngbin Baek, Dong-Gyun Kim, Jimin Shim, Jeyong Yoon,  
Jong-Chan Lee\**

School of Chemical and Biological Engineering and Institute of Chemical Process, Seoul  
National University, 599 Gwanak-ro, Gwanak-gu, Seoul 151-742, Republic of Korea

\*Corresponding authors: J.-C. Lee, E-mail: [jongchan@snu.ac.kr](mailto:jongchan@snu.ac.kr), Phone: +82 2 880 7070,  
Fax: +82 2 888 1604.

**Table S1.** Membrane separation performance in current works in other CNT-polymer composite membranes and that of commercialized membrane.

| Polymer matrix                 | CNT [wt%] <sup>a</sup>    | Water flux [L <sup>-1</sup> m <sup>-1</sup> h <sup>-1</sup> , LMH] | Rejection [%] | Feed solution                            | Feed pressure [Bar] | Unit water flux [LMH bar <sup>-1</sup> ] | Ref. <sup>b</sup>   |
|--------------------------------|---------------------------|--------------------------------------------------------------------|---------------|------------------------------------------|---------------------|------------------------------------------|---------------------|
| LFC-1 (commercialized)         | -                         | 39.50                                                              | 96.50         | NaCl 2000 ppm                            | 15.5                | 2.54                                     | Tested in this work |
| Polysulfone                    | MWNT 0.04 wt%             | 9.3                                                                | 75            | Na <sub>2</sub> SO <sub>4</sub>          | 4.0                 | 2.33                                     | 36                  |
|                                |                           | 9.3                                                                | 17            | NaCl                                     | 4.0                 | 2.33                                     |                     |
| Polyamide                      | MWNT 0.015 wt%            | 28                                                                 | 76            | NaCl 4000 ppm                            | 39.0                | 0.71                                     | 40                  |
| Polyamide (PEI/IPD)            | MWNT 0.5 wt%              | 14.04                                                              | 96.0          | Brilliant blue 0.01 wt%                  | 3.45                | 4.07                                     | 79                  |
| Polyester (TMC/TEOA)           | MWNT 0.05 wt%             | 4.7                                                                | 70            | Na <sub>2</sub> SO <sub>4</sub> 5 mM     | 6.0                 | 0.78                                     | 81                  |
| Brominated polyphenylene oxide | MWNT 5 wt%                | 487                                                                | 94.18         | Egg albumin 500 ppm                      | 2.0                 | 243.5                                    | 82                  |
| Polyamide (PIP/TMC)            | MWNT 0.05 wt%             | 69.84                                                              | 99.0          | Na <sub>2</sub> SO <sub>4</sub> 2000 ppm | 10.0                | 6.98                                     | 80                  |
|                                |                           | 25.2                                                               | 44.1          | NaCl 2000 ppm                            | 10.0                | 2.52                                     |                     |
| Polysulfone                    | MWNT 0.02 wt%             | 175                                                                | 45            | PEG 20,000 50 ppm                        | 1.0                 | 175                                      | 48                  |
| Polyamide (MPD/TMC)            | Zwitterion-SWNT 20 wt%    | 48.45                                                              | 98.6          | NaCl 2000 ppm                            | 36.54               | 1.33                                     | 43                  |
| Polyamide (MPD/TMC)            | MWNT 0.1 wt%              | 28.05                                                              | 90            | NaCl 2000 ppm                            | 16.0                | 1.75                                     | 78                  |
| <b>Polyamide (MPD/TMC)</b>     | <b>MWNT-COOH 0.17 wt%</b> | <b>44.34</b>                                                       | <b>95.72</b>  | <b>NaCl 2000 ppm</b>                     | <b>15.5</b>         | <b>2.86</b>                              | <b>This work</b>    |

<sup>a</sup>wt% in polymer matrix, <sup>b</sup>References in main manuscript.

**Table S2.** Results of water flux and salt rejection values of polyamide membranes from different monomer and CNT4 concentration.

| CNT\MPD<br>[wt%] <sup>a</sup> | Water flux [ $\text{L}^{-1} \text{m}^{-2} \text{h}^{-1}$ , LMH]<br>(Salt rejection [%]) |                                |                                |                                |                                |
|-------------------------------|-----------------------------------------------------------------------------------------|--------------------------------|--------------------------------|--------------------------------|--------------------------------|
|                               | 1                                                                                       | 2                              | 3                              | 4                              | 5                              |
| 0                             | 26.86 ± 3.07<br>(97.11 ± 0.55)                                                          | 36.60 ± 0.31<br>(97.57 ± 0.7)  | 34.34 ± 1.07<br>(97.49 ± 0.89) | 32.60 ± 1.27<br>(96.80 ± 0.36) | 28.31 ± 0.73<br>(95.50 ± 1.03) |
| 0.0002                        | 28.78 ± 2.2<br>(97.19 ± 0.30)                                                           | 35.24 ± 1.58<br>(97.01 ± 1.01) | 36.77 ± 1.2<br>(96.42 ± 0.64)  | 33.11 ± 1.98<br>(96.75 ± 0.57) | 30.35 ± 0.67<br>(94.79 ± 0.64) |
| 0.001                         | 31.14 ± 1.34<br>(96.23 ± 0.56)                                                          | 38.23 ± 1.49<br>(96.63 ± 0.52) | 44.34 ± 2.37<br>(95.72 ± 0.38) | 40.08 ± 0.15<br>(95.19 ± 0.34) | 36.26 ± 0.81<br>(95.62 ± 0.67) |
| 0.005                         | 30.92 ± 1.2<br>(95.49 ± 0.75)                                                           | 37.79 ± 2.52<br>(95.99 ± 1.13) | 38.74 ± 0.83<br>(95.91 ± 0.38) | 37.36 ± 1.39<br>(95.77 ± 0.32) | 34.47 ± 2.32<br>(95.25 ± 0.81) |

<sup>a</sup>wt% in aqueous solution using interfacial polymerization

**Table S3.** Surface compositions of polyamide-modified silicon wafer and PA membrane.

| Atom | PA membrane<br>[%] | Si wafer<br>[%] |
|------|--------------------|-----------------|
| C    | 71.48              | 69.97           |
| O    | 17.51              | 19.22           |
| N    | 11.01              | 10.81           |

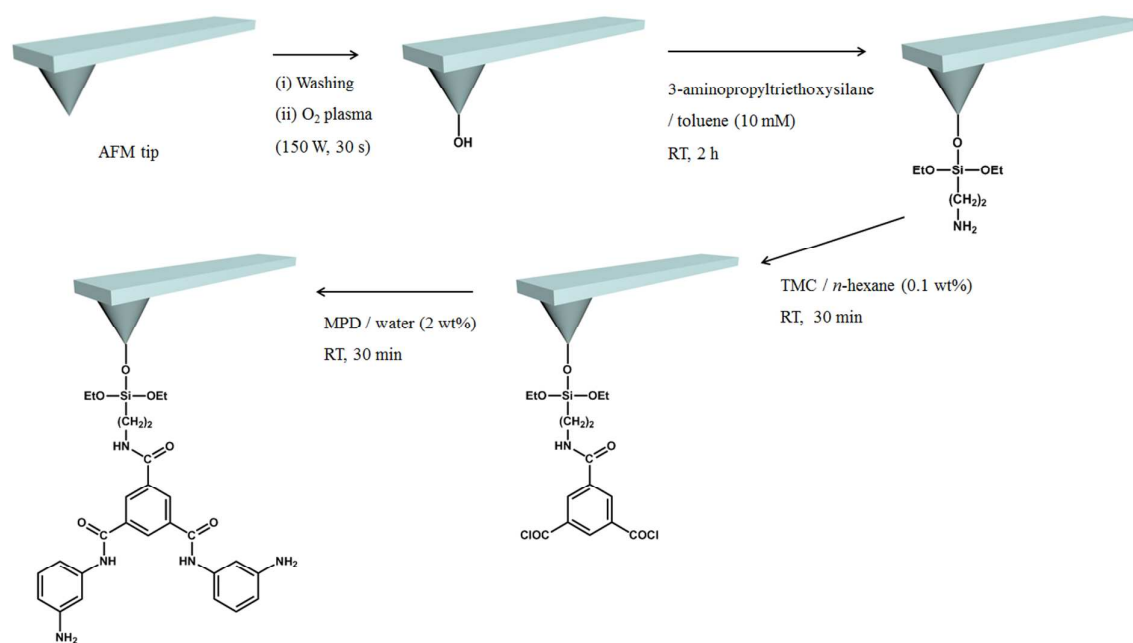

**Figure S1.** Functionalization procedure of AFM tip to polyamide repeating unit.

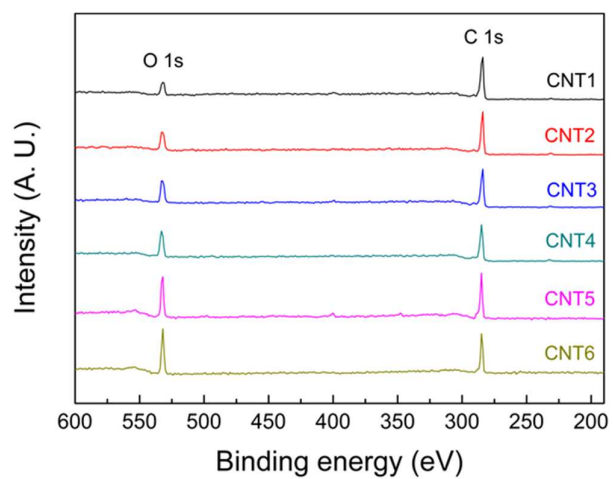

**Figure S2.** XPS spectra of CNTs in Table 1 of main manuscript.

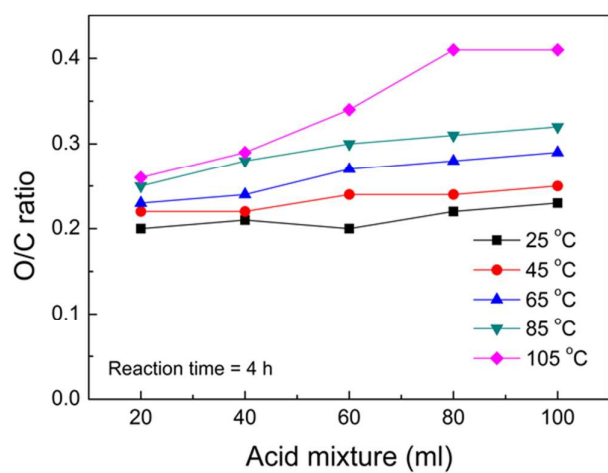

**Figure S3.** O/C ratios of CNTs modified in various conditions.

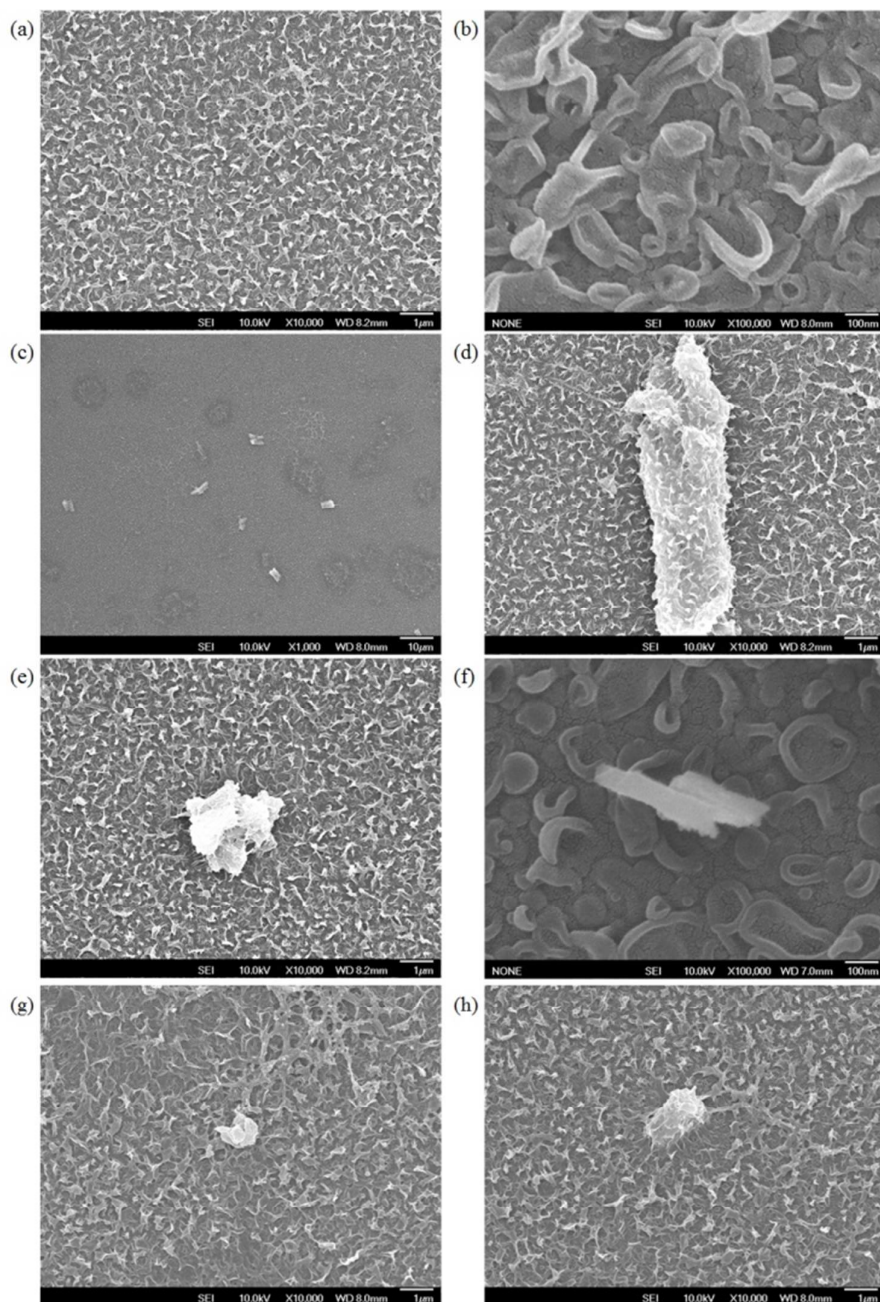

**Figure S4.** SEM images of top surfaces of the (a) PA membrane (prepared by 2 wt% of MPD in aqueous solution) (x 10,000), (b) PA membrane (x 100,000), (c) PA-CNT1 membrane (x 1,000), (d) PA-CNT1 membrane (x 10,000), (e) PA-CNT2 membrane (x 10,000), (f) PA-CNT4 membrane (x 100,000), (g) and (h) PA-CNT6 membrane (x10,000) (All the PA-CNT membranes were prepared by 2 wt% of MPD and 0.002 wt% of CNT in aqueous solution).

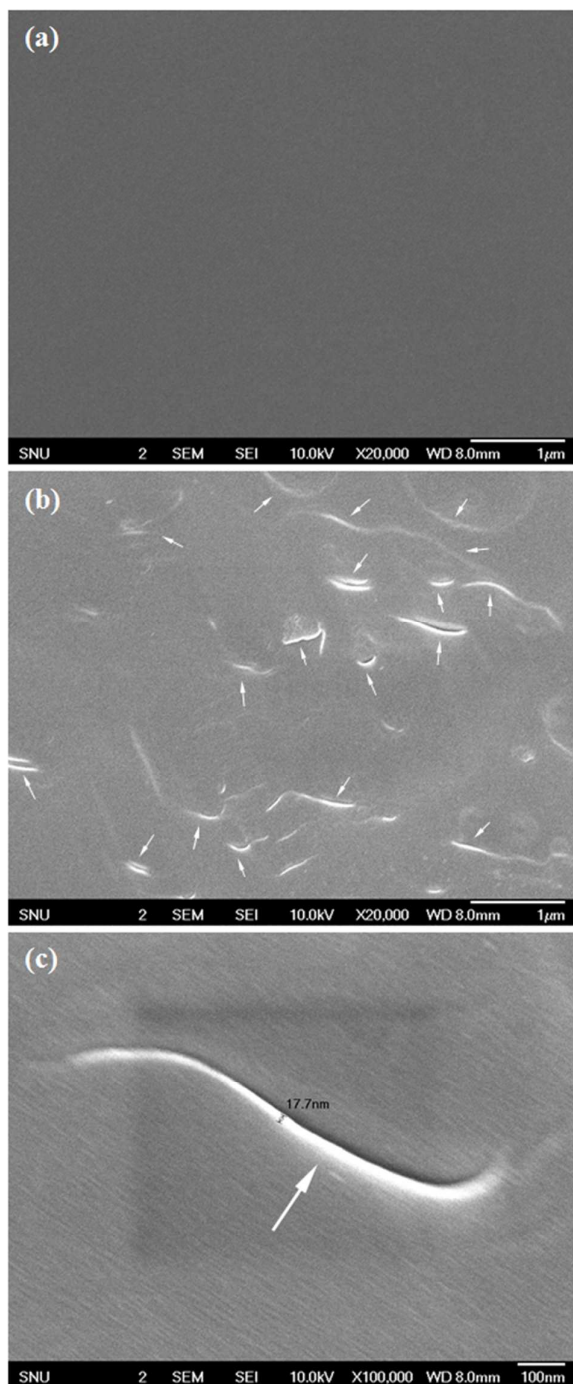

**Figure S5.** SEM images of bottom side of the (a) PA membrane (prepared by 2 wt% of MPD in aqueous solution) (x 20,000), (b) and (c) PA-CNT4 membrane (x 20,000 and x 100,000) (All the PA-CNT membranes were prepared by 2 wt% of MPD and 0.002 wt% of CNT in aqueous solution).



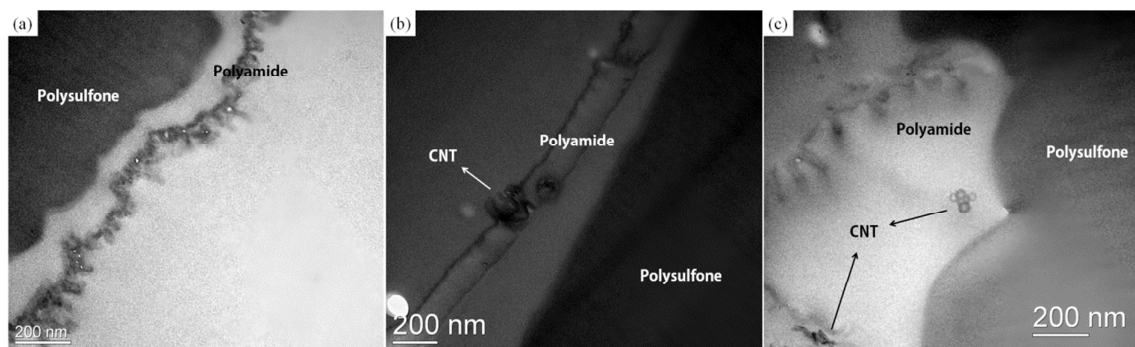

**Figure S6.** TEM images of cross-section of (a) PA, (b) PA-CNT1, and (c) PA-CNT4 membranes.

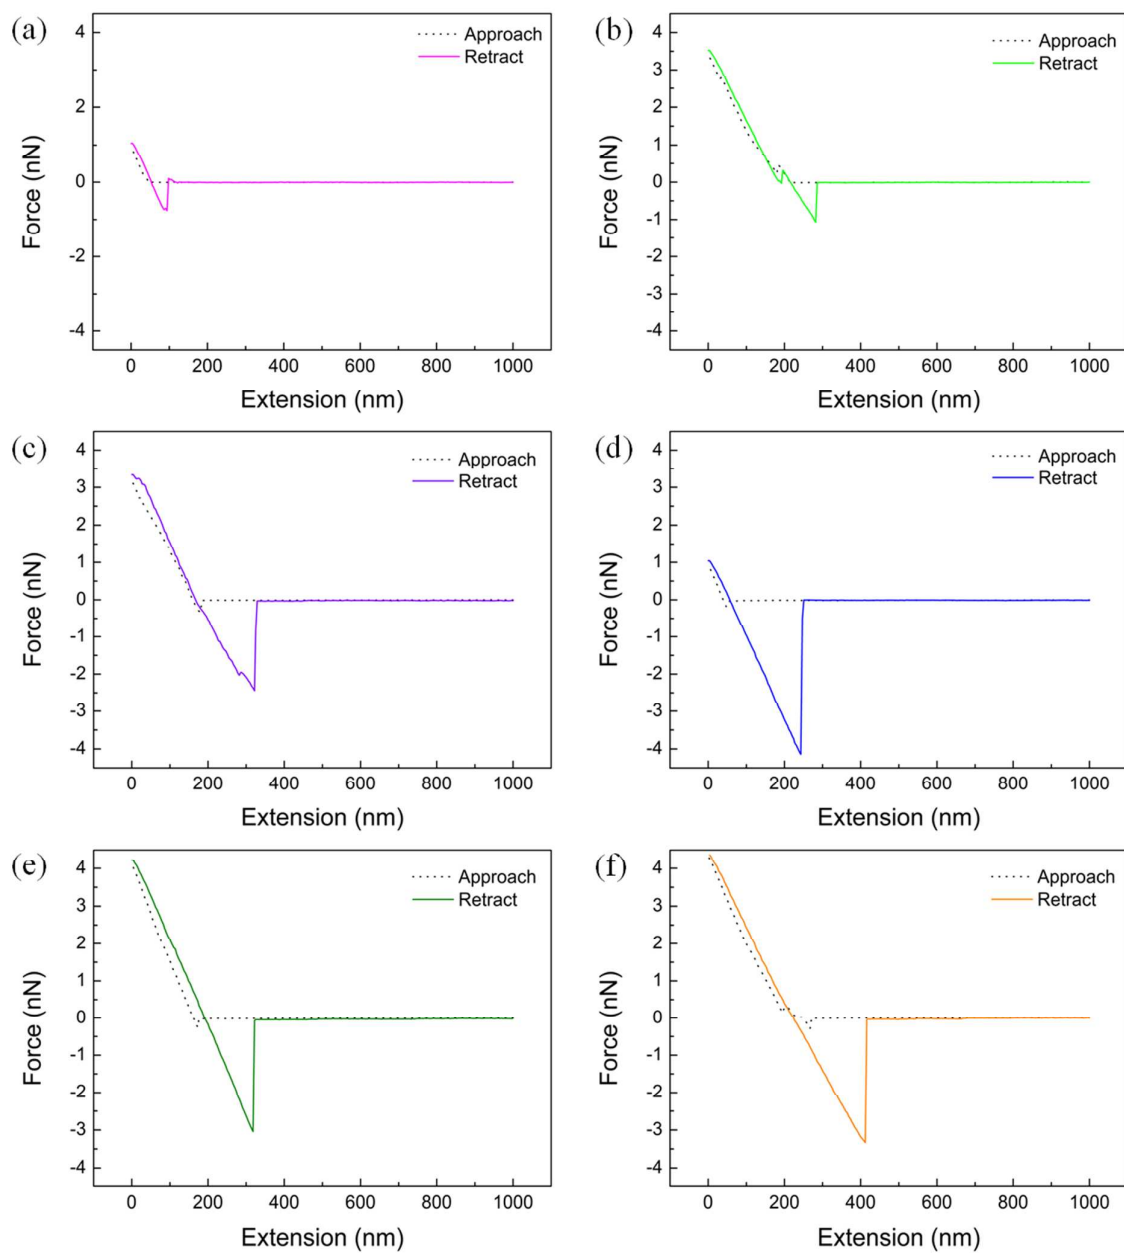

**Figure S7.** Typical force-extension curves recorded with a polyamide-modified tip against various types of CNT; (a) CNT1, (b) CNT2, (c) CNT3, (d) CNT4, (e) CNT5 and (f) CNT6.

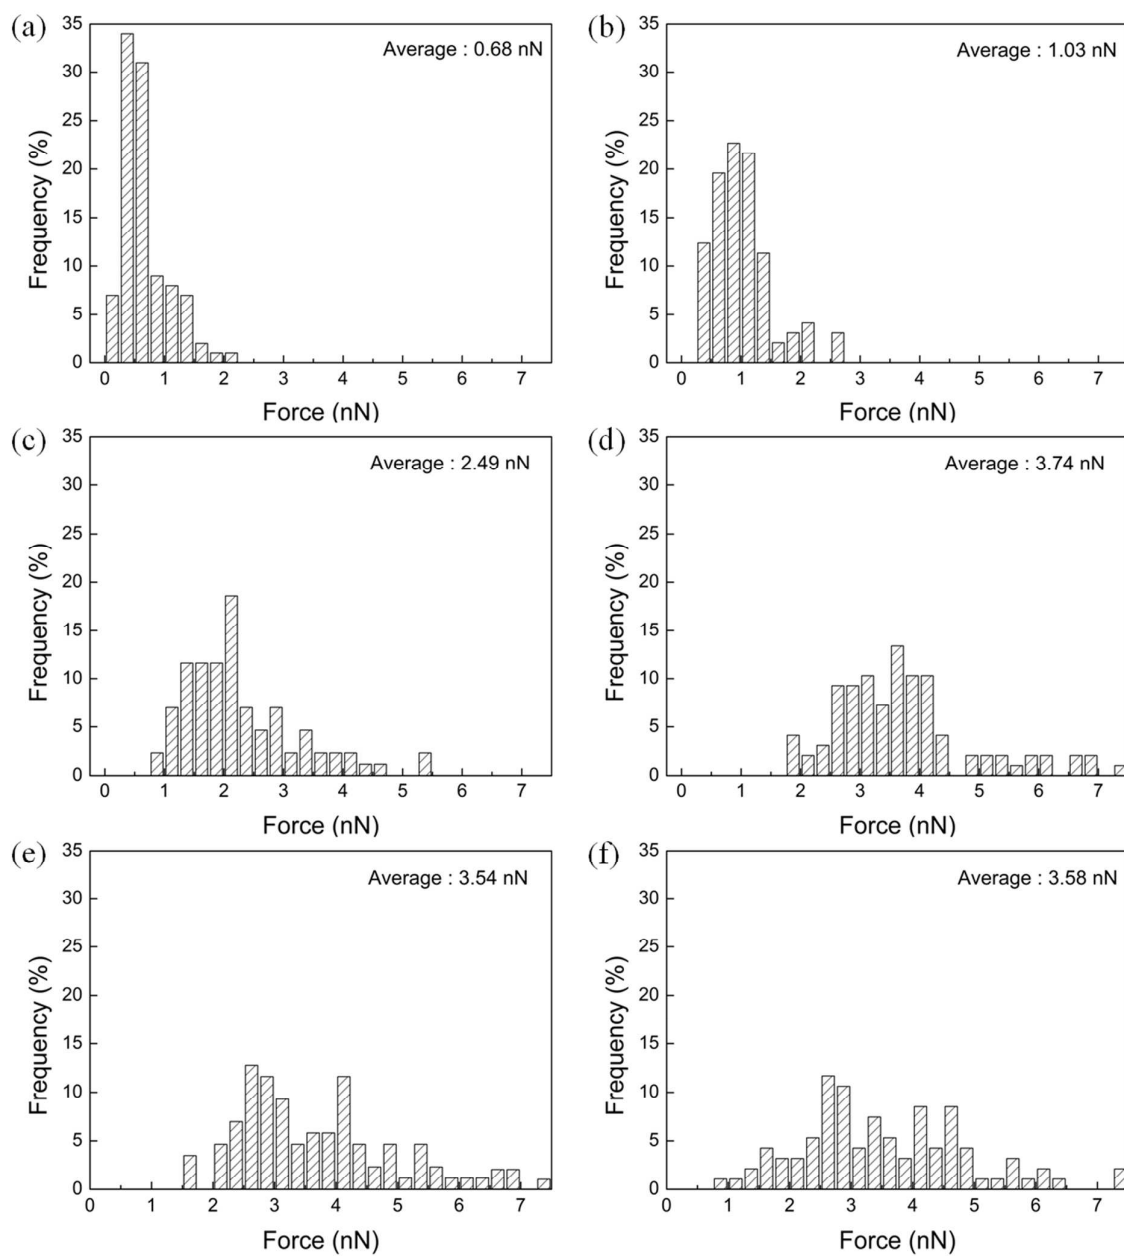

**Figure S8.** Interaction force histograms which were used to determine the mean interaction forces; (a) CNT1, (b) CNT2, (c) CNT3, (d) CNT4, (e) CNT5 and (f) CNT6.

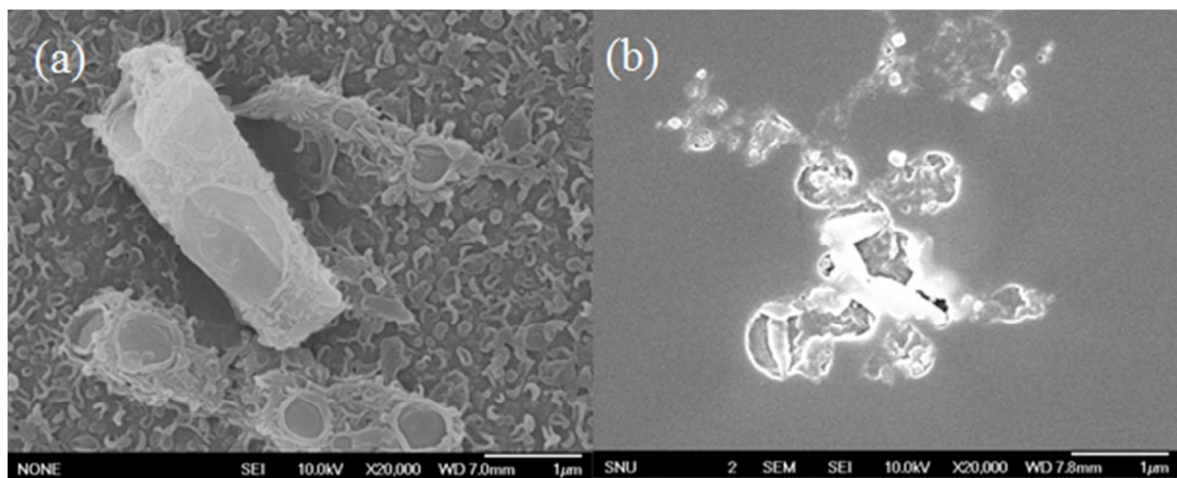

**Figure S9.** SEM images of PA-CNT4 membrane with 0.025 wt% of CNT; (a) surface and (b) bottom side.

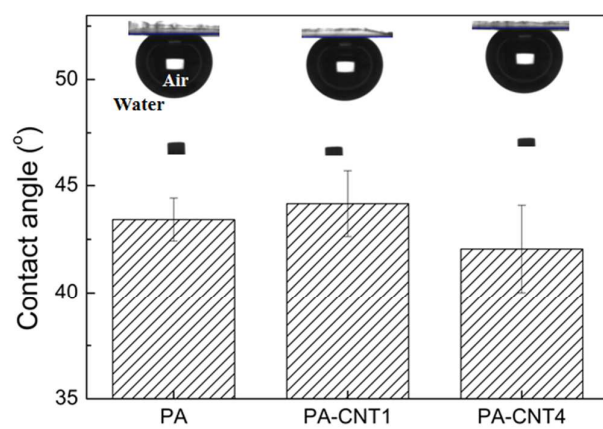

**Figure S10.** Contact angles of PA, PA-CNT1, and PA-CNT4 membranes measured by captive bubble method.

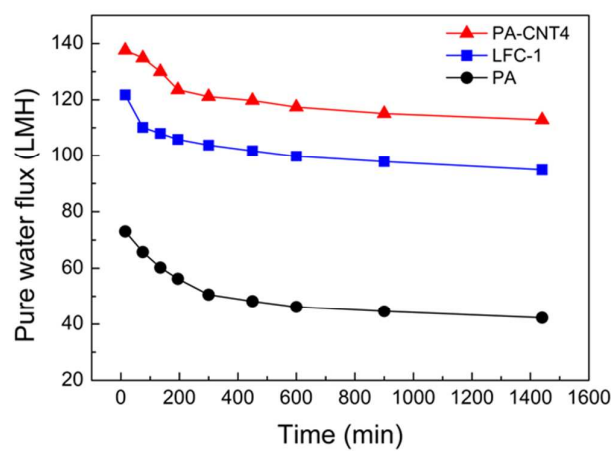

**Figure S11.** Pure water flux of PA and PA-CNT4 membranes with time (operated under the 40 bar of feed pressure).

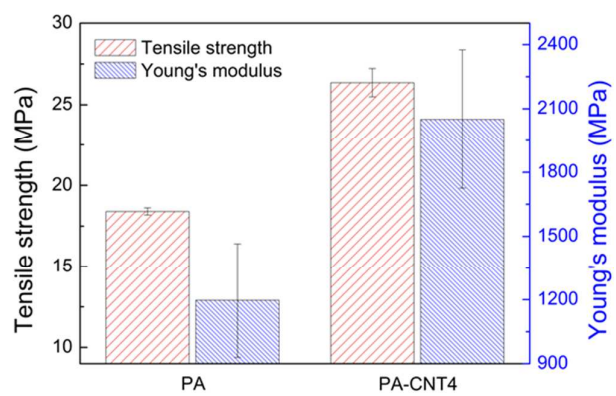

**Figure S12.** Mechanical properties of PA and PA-CNT4 membrane tested by UTM.
